# Supplementary material for: Trait-based predation suitability offers insight into effects of changing prey communities
Source: PubMed Central journal article supplement (PMC6225838; doi:10.7717/peerj.5899), 2018-11-06

# Workflow and results of GLMM in Weigel & Bonsdorff: Trait-based predation suitability offers insight into effects of changing prey communities

```
#Library
library(lme4)

## Loading required package: Matrix
library(lmerTest)

##
## Attaching package: 'lmerTest'
## The following object is masked from 'package:lme4':
##
##   lmer
## The following object is masked from 'package:stats':
##
##   step
#Transform predation suitability values
valueT<-log(value+0.01)
#scale to 0 mean and unit variance
v<-scale(valueT)
#include transformed suitability values "v" in data frame
data = cbind(v,data)
colnames(data)[1] = "v"
head(data)

##           v X           ID station exposure year      trait
## 1 -0.9449658 1 S_AlBe1973   AlBe         S 1973        1_S
## 2  1.7354695 2 S_AlBe1973   AlBe         S 1973        1_M
## 3 -1.0715515 3 S_AlBe1973   AlBe         S 1973        1_L
## 4  0.3411671 4 S_AlBe1973   AlBe         S 1973  2_No_prot.
## 5 -0.4992692 5 S_AlBe1973   AlBe         S 1973        2_Tube
## 6 -1.0715515 6 S_AlBe1973   AlBe         S 1973        2_Burrow
##           variable      value
## 1 Abramis_bjoerkna 0.002089864
## 2 Abramis_bjoerkna 0.662486938
## 3 Abramis_bjoerkna 0.000000000
## 4 Abramis_bjoerkna 0.073145246
## 5 Abramis_bjoerkna 0.013584117
## 6 Abramis_bjoerkna 0.000000000

#year as factor for analysis
yearN<-as.factor(year)

#Fish community model including all 11 fish species
m1 <- lmer(v~yearN+exposure+ (1|station) + (1|variable)+ (1|trait), data)
summary(m1)

## Linear mixed model fit by REML. t-tests use Satterthwaite's method [
```

```

## lmerModLmerTest]
## Formula: v ~ yearN + exposure + (1 | station) + (1 | variable) + (1 |
##   trait)
##   Data: data
##
## REML criterion at convergence: 36144.3
##
## Scaled residuals:
##   Min       1Q   Median       3Q      Max
## -3.3312 -0.6336 -0.0468  0.6602  4.2921
##
## Random effects:
##   Groups   Name                Variance Std.Dev.
##   trait    (Intercept)  0.507825 0.71262
##   station  (Intercept)  0.009406 0.09698
##   variable (Intercept)  0.013139 0.11463
##   Residual                    0.489573 0.69969
## Number of obs: 16896, groups:  trait, 24; station, 16; variable, 11
##
## Fixed effects:
##              Estimate Std. Error      df t value Pr(>|t|)
## (Intercept) -3.192e-02  1.539e-01  2.834e+01  -0.207   0.837
## yearN1989   -3.082e-02  1.523e-02  1.684e+04  -2.024   0.043 *
## yearN2000    9.051e-02  1.523e-02  1.684e+04   5.945  2.82e-09 ***
## yearN2013    1.113e-01  1.523e-02  1.684e+04   7.310  2.78e-13 ***
## exposureS   -2.166e-02  4.967e-02  1.400e+01  -0.436   0.669
## ---
## Signif. codes:  0 '***' 0.001 '**' 0.01 '*' 0.05 '.' 0.1 ' ' 1
##
## Correlation of Fixed Effects:
##              (Intr) yN1989 yN2000 yN2013
## yearN1989  -0.049
## yearN2000  -0.049  0.500
## yearN2013  -0.049  0.500  0.500
## exposureS -0.161  0.000  0.000  0.000

```

```

hist(resid(m1))

```

## Histogram of resid(m1)

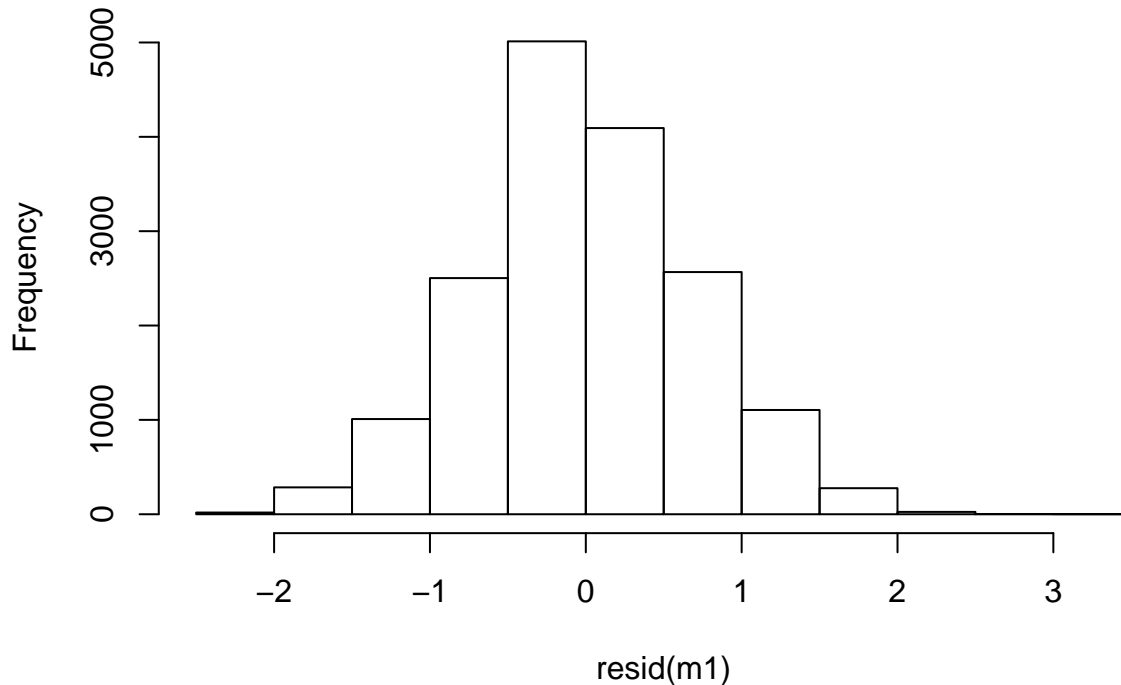

```
#Data for species models
# 1) Define each species data frame from original data frame
Abr_bra <- subset(data, variable=="Abramis_brama")
Abr_bjo <- subset(data, variable=="Abramis_bjoerkna")
Clu<- subset(data, variable=="Clupea_harengus")
Cor <- subset(data, variable=="Coregonus_lavaretus")
Gym<- subset(data, variable=="Gymnocephalus_cernuus")
Leu<- subset(data, variable=="Leuciscus_idus")
Osm<- subset(data, variable=="Osmerus_eperlanus")
Per<- subset(data, variable=="Perca_fluviatilis")
Pla<- subset(data, variable=="Platichthys_flesus")
Rut<- subset(data, variable=="Rutilus_rutilus")
Tri<- subset(data, variable=="Trigloporus_quadricornis")

# 2) Run the models
## MODEL ABRAMIS BRAMA ##
yearABR<-as.factor(Abr_bra$year)
traitABR<-as.factor(Abr_bra$trait)
ABR<-lmer(v~yearABR+exposure+(1|station)+(1|traitABR) ,Abr_bra)
summary(ABR)

## Linear mixed model fit by REML. t-tests use Satterthwaite's method [
## lmerModLmerTest]
## Formula: v ~ yearABR + exposure + (1 | station) + (1 | traitABR)
## Data: Abr_bra
##
## REML criterion at convergence: 2984.4
##
## Scaled residuals:
## Min 1Q Median 3Q Max
```

```

## -3.6162 -0.5587 0.0066 0.6681 2.5780
##
## Random effects:
## Groups Name Variance Std.Dev.
## traitABR (Intercept) 0.580448 0.76187
## station (Intercept) 0.007564 0.08697
## Residual 0.372618 0.61042
## Number of obs: 1536, groups: traitABR, 24; station, 16
##
## Fixed effects:
## Estimate Std. Error df t value Pr(>|t|)
## (Intercept) 0.09607 0.16231 26.59909 0.592 0.55893
## yearABR1989 -0.03913 0.04405 1494.00000 -0.888 0.37460
## yearABR2000 0.09789 0.04405 1494.00000 2.222 0.02643 *
## yearABR2013 0.13031 0.04405 1494.00000 2.958 0.00314 **
## exposureS -0.03373 0.05349 14.00000 -0.631 0.53848
## ---
## Signif. codes: 0 '***' 0.001 '**' 0.01 '*' 0.05 '.' 0.1 ' ' 1
##
## Correlation of Fixed Effects:
## (Intr) yABR19 yABR200 yABR201
## yearABR1989 -0.136
## yearABR2000 -0.136 0.500
## yearABR2013 -0.136 0.500 0.500
## exposureS -0.165 0.000 0.000 0.000

```

```
hist(resid(ABR))
```

**Histogram of resid(ABR)**

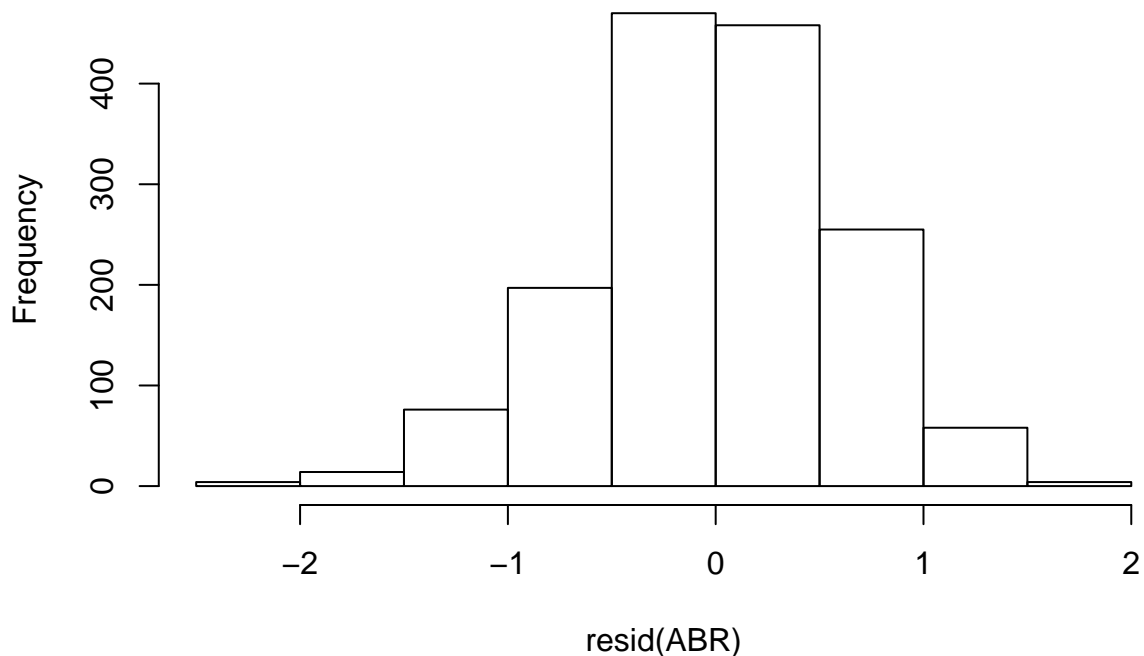

```

## MODEL ABRAMIS BJOERKNA ##
yearABB<-as.factor(Abr_bjo$year)

```

```

traitABB<-as.factor(Abr_bjo$trait)
ABB<-lmer(v~yearABB+exposure+(1|station)+(1|traitABB) ,Abr_bjo)
summary(ABB)

```

```

## Linear mixed model fit by REML. t-tests use Satterthwaite's method [
## lmerModLmerTest]
## Formula: v ~ yearABB + exposure + (1 | station) + (1 | traitABB)
## Data: Abr_bjo
##
## REML criterion at convergence: 2795.1
##
## Scaled residuals:
## Min 1Q Median 3Q Max
## -4.2161 -0.3491 0.0402 0.4998 2.6296
##
## Random effects:
## Groups Name Variance Std.Dev.
## traitABB (Intercept) 0.81832 0.9046
## station (Intercept) 0.01142 0.1069
## Residual 0.32578 0.5708
## Number of obs: 1536, groups: traitABB, 24; station, 16
##
## Fixed effects:
## Estimate Std. Error df t value Pr(>|t|)
## (Intercept) 0.02251 0.19127 26.02781 0.118 0.907
## yearABB1989 -0.02311 0.04119 1494.00000 -0.561 0.575
## yearABB2000 -0.02673 0.04119 1494.00000 -0.649 0.516
## yearABB2013 0.04983 0.04119 1494.00000 1.210 0.227
## exposureS 0.02601 0.06085 14.00000 0.427 0.676
##
## Correlation of Fixed Effects:
## (Intr) yABB19 yABB200 yABB201
## yearABB1989 -0.108
## yearABB2000 -0.108 0.500
## yearABB2013 -0.108 0.500 0.500
## exposureS -0.159 0.000 0.000 0.000

```

```

hist(resid(ABB))

```

## Histogram of resid(ABB)

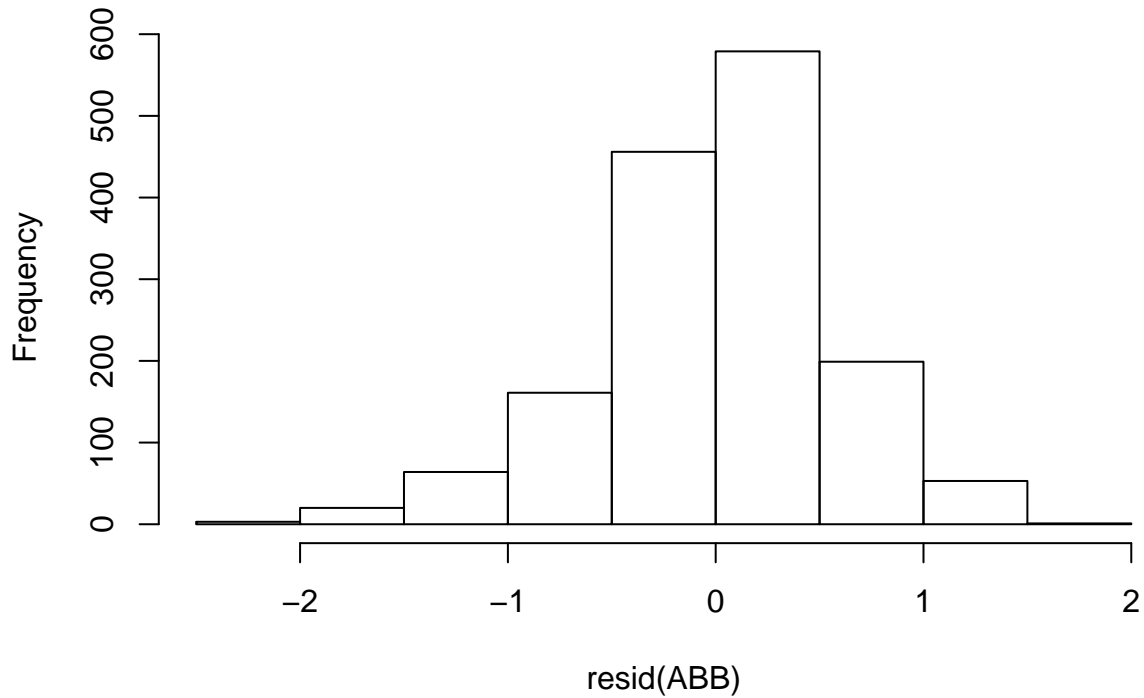

```
## MODEL CLUPEA HARENGUS ##
yearCLU<-as.factor(Clu$year)
traitCLU<-as.factor(Clu$trait)
CLU<-lmer(v~yearCLU+exposure+(1|station)+(1|traitCLU) ,Clu)
summary(CLU)

## Linear mixed model fit by REML. t-tests use Satterthwaite's method [
## lmerModLmerTest]
## Formula: v ~ yearCLU + exposure + (1 | station) + (1 | traitCLU)
## Data: Clu
##
## REML criterion at convergence: 2718
##
## Scaled residuals:
## Min 1Q Median 3Q Max
## -4.3859 -0.3228 0.0335 0.4450 3.9450
##
## Random effects:
## Groups Name Variance Std.Dev.
## traitCLU (Intercept) 0.706376 0.84046
## station (Intercept) 0.002293 0.04788
## Residual 0.312949 0.55942
## Number of obs: 1536, groups: traitCLU, 24; station, 16
##
## Fixed effects:
## Estimate Std. Error df t value Pr(>|t|)
## (Intercept) -0.18771 0.17532 24.71925 -1.071 0.294655
## yearCLU1989 -0.06239 0.04037 1493.99999 -1.545 0.122482
## yearCLU2000 0.14754 0.04037 1493.99999 3.654 0.000267 ***
## yearCLU2013 0.15864 0.04037 1493.99999 3.930 8.9e-05 ***
```

```
## exposureS      -0.03010    0.03726   14.00000   -0.808  0.432636
## ---
## Signif. codes:  0 '***' 0.001 '**' 0.01 '*' 0.05 '.' 0.1 ' ' 1
##
## Correlation of Fixed Effects:
##           (Intr) yCLU19 yCLU200 yCLU201
## yearCLU1989 -0.115
## yearCLU2000 -0.115  0.500
## yearCLU2013 -0.115  0.500  0.500
## exposureS   -0.106  0.000  0.000  0.000
```

```
hist(resid(CLU))
```

**Histogram of resid(CLU)**

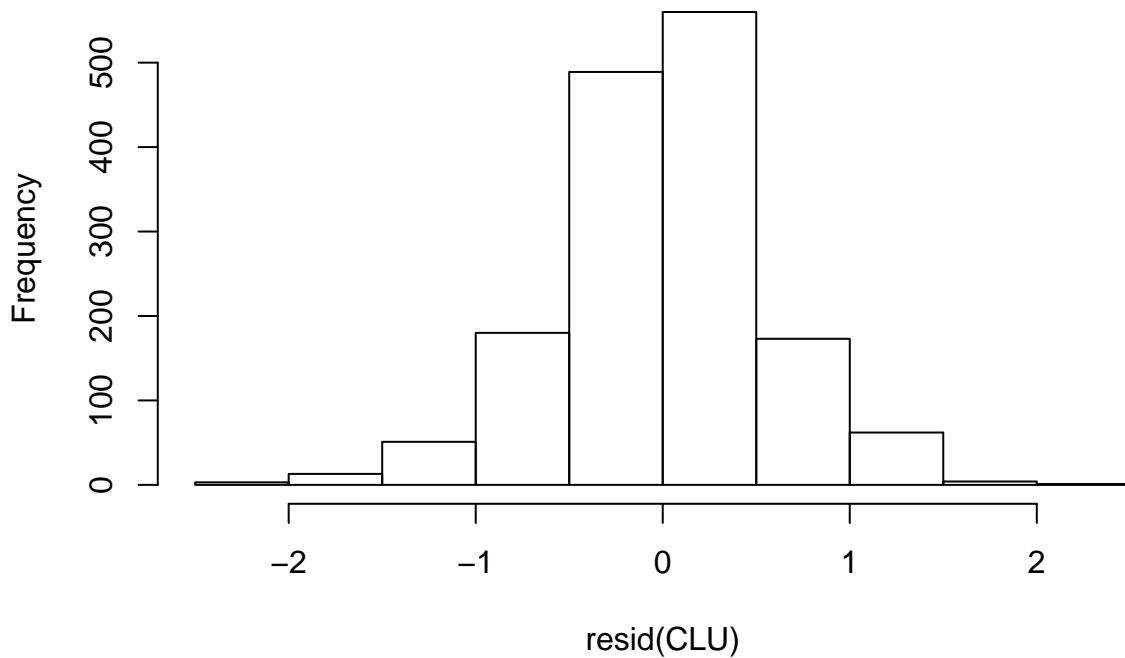

```
## MODEL COREGONUS LAVARETUS ##
yearCOR<-as.factor(Cor$year)
traitCOR<-as.factor(Cor$trait)
COR<-lmer(v~yearCOR+exposure+(1|station)+(1|traitCOR) ,Cor)
summary(COR)
```

```
## Linear mixed model fit by REML. t-tests use Satterthwaite's method [
## lmerModLmerTest]
## Formula: v ~ yearCOR + exposure + (1 | station) + (1 | traitCOR)
## Data: Cor
##
## REML criterion at convergence: 2821.7
##
## Scaled residuals:
##   Min      1Q  Median      3Q      Max
## -3.7337 -0.5253  0.0050  0.6562  2.8339
##
## Random effects:
```

```

## Groups Name Variance Std.Dev.
## traitCOR (Intercept) 0.606791 0.77897
## station (Intercept) 0.008622 0.09285
## Residual 0.333777 0.57773
## Number of obs: 1536, groups: traitCOR, 24; station, 16
##
## Fixed effects:
## Estimate Std. Error df t value Pr(>|t|)
## (Intercept) 0.04040 0.16567 26.49290 0.244 0.8092
## yearCOR1989 -0.02068 0.04169 1494.00000 -0.496 0.6199
## yearCOR2000 0.08003 0.04169 1494.00000 1.919 0.0551 .
## yearCOR2013 0.09347 0.04169 1494.00000 2.242 0.0251 *
## exposureS -0.04579 0.05500 14.00000 -0.833 0.4191
## ---
## Signif. codes: 0 '***' 0.001 '**' 0.01 '*' 0.05 '.' 0.1 ' ' 1
##
## Correlation of Fixed Effects:
## (Intr) yCOR19 yCOR200 yCOR201
## yearCOR1989 -0.126
## yearCOR2000 -0.126 0.500
## yearCOR2013 -0.126 0.500 0.500
## exposureS -0.166 0.000 0.000 0.000

```

```
hist(resid(COR))
```

### Histogram of resid(COR)

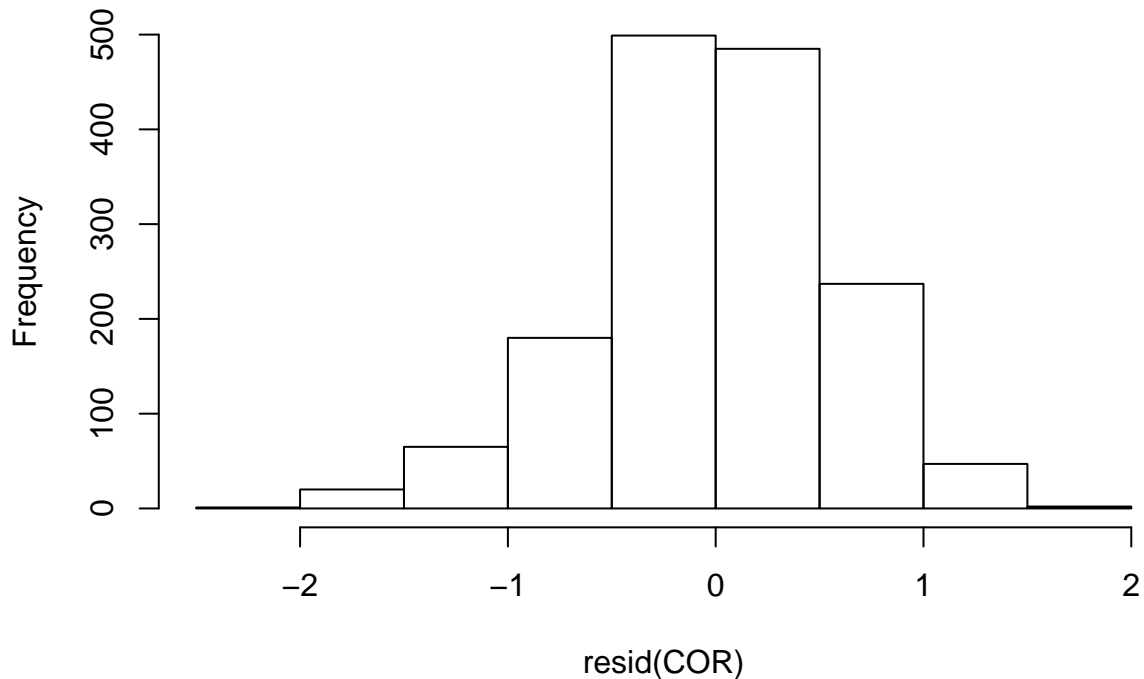

```

## MODEL GYMNOCEPHALUS CERNUUS ##
yearGYM<-as.factor(Gym$year)
traitGYM<-as.factor(Gym$trait)
GYM<-lmer(v~yearGYM+exposure+(1|station)+(1|traitGYM) ,Gym)
summary(GYM)

```



```

## Linear mixed model fit by REML. t-tests use Satterthwaite's method [
## lmerModLmerTest]
## Formula: v ~ yearGYM + exposure + (1 | station) + (1 | traitGYM)
## Data: Gym
##
## REML criterion at convergence: 2940.1
##
## Scaled residuals:
## Min 1Q Median 3Q Max
## -3.9974 -0.4814 0.0162 0.5369 3.2101
##
## Random effects:
## Groups Name Variance Std.Dev.
## traitGYM (Intercept) 0.734391 0.85697
## station (Intercept) 0.009062 0.09519
## Residual 0.360056 0.60005
## Number of obs: 1536, groups: traitGYM, 24; station, 16
##
## Fixed effects:
## Estimate Std. Error df t value Pr(>|t|)
## (Intercept) -0.05406 0.18140 26.07674 -0.298 0.76804
## yearGYM1989 -0.05648 0.04330 1494.00000 -1.304 0.19235
## yearGYM2000 0.12604 0.04330 1494.00000 2.911 0.00366 **
## yearGYM2013 0.17314 0.04330 1494.00000 3.998 6.69e-05 ***
## exposureS 0.02354 0.05660 14.00000 0.416 0.68379
## ---
## Signif. codes: 0 '***' 0.001 '**' 0.01 '*' 0.05 '.' 0.1 ' ' 1
##
## Correlation of Fixed Effects:
## (Intr) yGYM19 yGYM200 yGYM201
## yearGYM1989 -0.119
## yearGYM2000 -0.119 0.500
## yearGYM2013 -0.119 0.500 0.500
## exposureS -0.156 0.000 0.000 0.000

```

hist(resid(GYM))

## Histogram of resid(GYM)

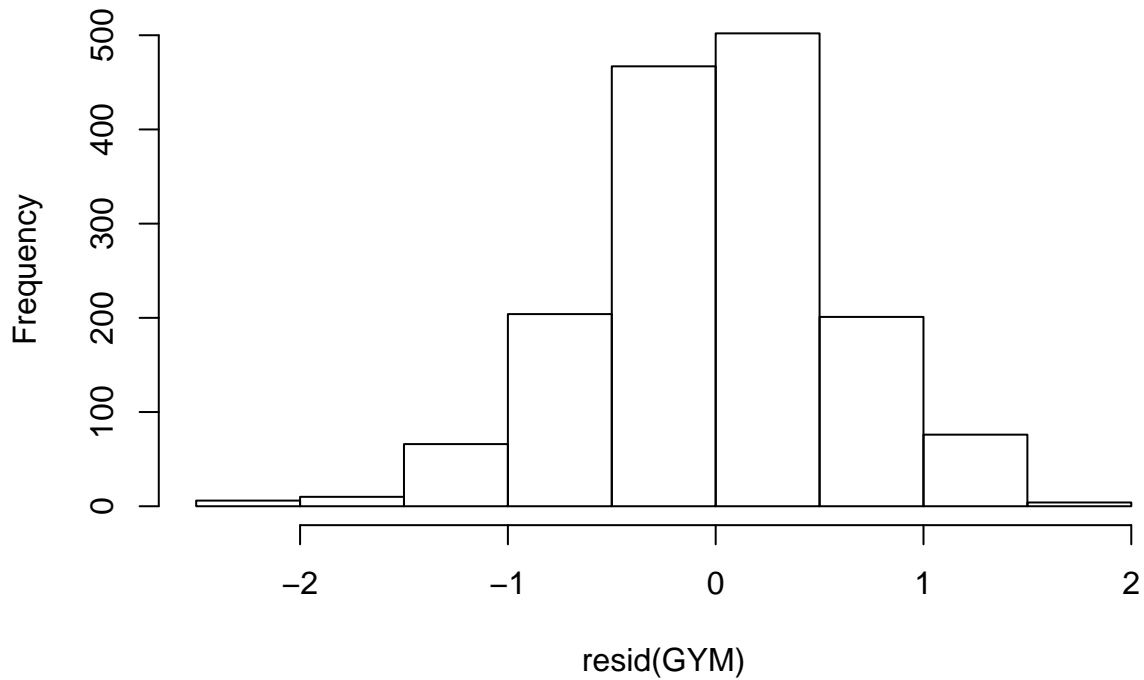

```
## MODEL LEUCISCUS IDUS ##
yearLEU<-as.factor(Leu$year)
traitLEU<-as.factor(Leu$trait)
LEU<-lmer(v~yearLEU+exposure+(1|station)+(1|traitLEU) ,Leu)
summary(LEU)
```

```
## Linear mixed model fit by REML. t-tests use Satterthwaite's method [
## lmerModLmerTest]
## Formula: v ~ yearLEU + exposure + (1 | station) + (1 | traitLEU)
## Data: Leu
##
## REML criterion at convergence: 2664.7
##
## Scaled residuals:
## Min 1Q Median 3Q Max
## -4.5224 -0.3360 0.0404 0.4728 2.6488
##
## Random effects:
## Groups Name Variance Std.Dev.
## traitLEU (Intercept) 0.74363 0.8623
## station (Intercept) 0.01157 0.1076
## Residual 0.29901 0.5468
## Number of obs: 1536, groups: traitLEU, 24; station, 16
##
## Fixed effects:
## Estimate Std. Error df t value Pr(>|t|)
## (Intercept) -0.12590 0.18277 26.24970 -0.689 0.4969
## yearLEU1989 -0.01865 0.03946 1494.00001 -0.473 0.6366
## yearLEU2000 0.02952 0.03946 1494.00001 0.748 0.4546
## yearLEU2013 0.07380 0.03946 1494.00001 1.870 0.0617 .
```

```
## exposureS      0.04312    0.06059   14.00000    0.712    0.4883
## ---
## Signif. codes:  0 '***' 0.001 '**' 0.01 '*' 0.05 '.' 0.1 ' ' 1
##
## Correlation of Fixed Effects:
##           (Intr) yLEU19 yLEU200 yLEU201
## yearLEU1989 -0.108
## yearLEU2000 -0.108  0.500
## yearLEU2013 -0.108  0.500  0.500
## exposureS   -0.166  0.000  0.000  0.000
```

```
hist(resid(LEU))
```

**Histogram of resid(LEU)**

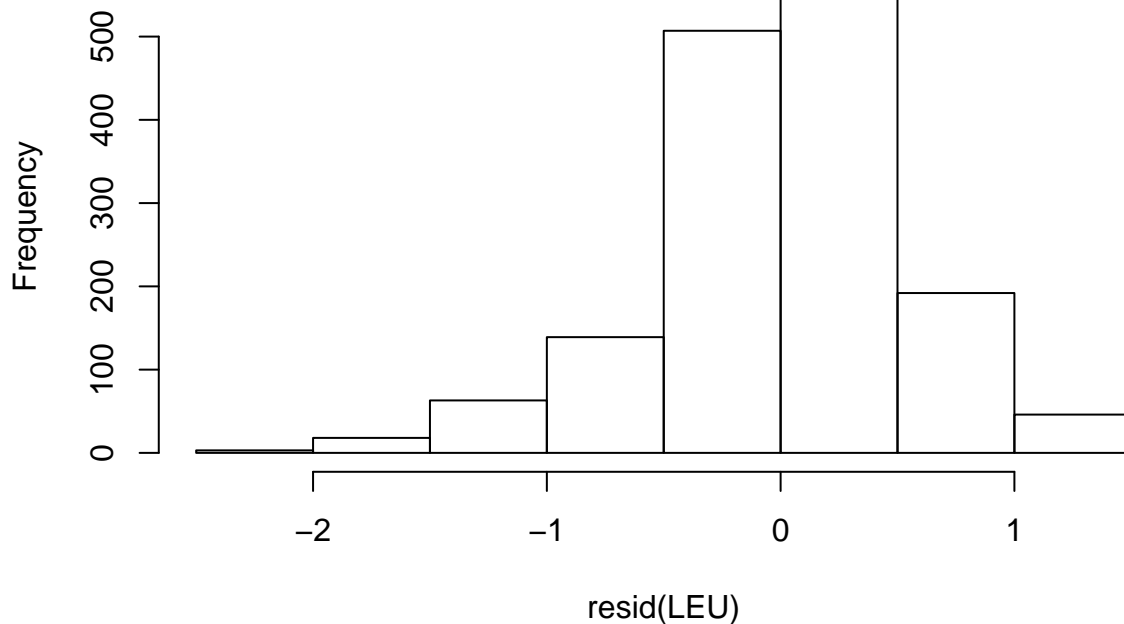

```
## MODEL LEUCISCUS IDUS ##
yearOSM<-as.factor(Osm$year)
traitOSM<-as.factor(Osm$trait)
OSM<-lmer(v~yearOSM+exposure+(1|station)+(1|traitOSM) ,Osm)
summary(OSM)
```

```
## Linear mixed model fit by REML. t-tests use Satterthwaite's method [
## lmerModLmerTest]
## Formula: v ~ yearOSM + exposure + (1 | station) + (1 | traitOSM)
## Data: Osm
##
## REML criterion at convergence: 2870.5
##
## Scaled residuals:
##   Min      1Q  Median      3Q      Max
## -3.9013 -0.5277  0.0013  0.5953  3.5770
##
## Random effects:
```

```

## Groups Name Variance Std.Dev.
## traitOSM (Intercept) 0.611795 0.78217
## station (Intercept) 0.007585 0.08709
## Residual 0.345085 0.58744
## Number of obs: 1536, groups: traitOSM, 24; station, 16
##
## Fixed effects:
## Estimate Std. Error df t value Pr(>|t|)
## (Intercept) -0.01201 0.16602 26.29437 -0.072 0.9429
## yearOSM1989 -0.02308 0.04239 1494.00000 -0.544 0.5862
## yearOSM2000 0.10292 0.04239 1494.00000 2.428 0.0153 *
## yearOSM2013 0.10644 0.04239 1494.00000 2.511 0.0122 *
## exposureS -0.01704 0.05287 14.00000 -0.322 0.7520
## ---
## Signif. codes: 0 '***' 0.001 '**' 0.01 '*' 0.05 '.' 0.1 ' ' 1
##
## Correlation of Fixed Effects:
## (Intr) yOSM19 yOSM200 yOSM201
## yearOSM1989 -0.128
## yearOSM2000 -0.128 0.500
## yearOSM2013 -0.128 0.500 0.500
## exposureS -0.159 0.000 0.000 0.000

```

```
hist(resid(OSM))
```

**Histogram of resid(OSM)**

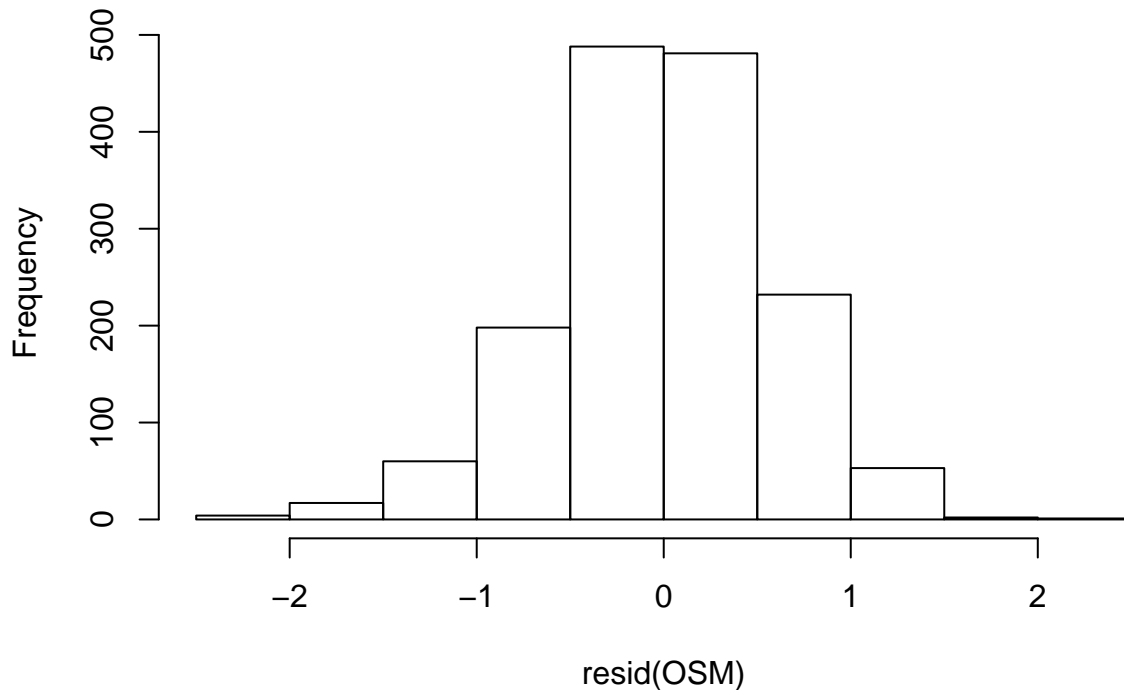

```

## MODEL PERCA FLUVIATILIS ##
yearPER<-as.factor(Per$year)
traitPER<-as.factor(Per$trait)
PER<-lmer(v~yearPER+exposure+(1|station)+(1|traitPER) ,Per)
summary(PER)

```

```

## Linear mixed model fit by REML. t-tests use Satterthwaite's method [
## lmerModLmerTest]
## Formula: v ~ yearPER + exposure + (1 | station) + (1 | traitPER)
## Data: Per
##
## REML criterion at convergence: 2919.9
##
## Scaled residuals:
## Min 1Q Median 3Q Max
## -3.4150 -0.5583 0.0036 0.6728 3.0005
##
## Random effects:
## Groups Name Variance Std.Dev.
## traitPER (Intercept) 0.552575 0.74335
## station (Intercept) 0.007571 0.08701
## Residual 0.357193 0.59766
## Number of obs: 1536, groups: traitPER, 24; station, 16
##
## Fixed effects:
## Estimate Std. Error df t value Pr(>|t|)
## (Intercept) 0.05725 0.15853 26.69965 0.361 0.72085
## yearPER1989 -0.02545 0.04313 1494.00000 -0.590 0.55525
## yearPER2000 0.10609 0.04313 1494.00000 2.460 0.01402 *
## yearPER2013 0.12095 0.04313 1494.00000 2.804 0.00511 **
## exposureS -0.05068 0.05313 14.00000 -0.954 0.35628
## ---
## Signif. codes: 0 '***' 0.001 '**' 0.01 '*' 0.05 '.' 0.1 ' ' 1
##
## Correlation of Fixed Effects:
## (Intr) yPER19 yPER200 yPER201
## yearPER1989 -0.136
## yearPER2000 -0.136 0.500
## yearPER2013 -0.136 0.500 0.500
## exposureS -0.168 0.000 0.000 0.000

```

hist(resid(PER))

## Histogram of resid(PER)

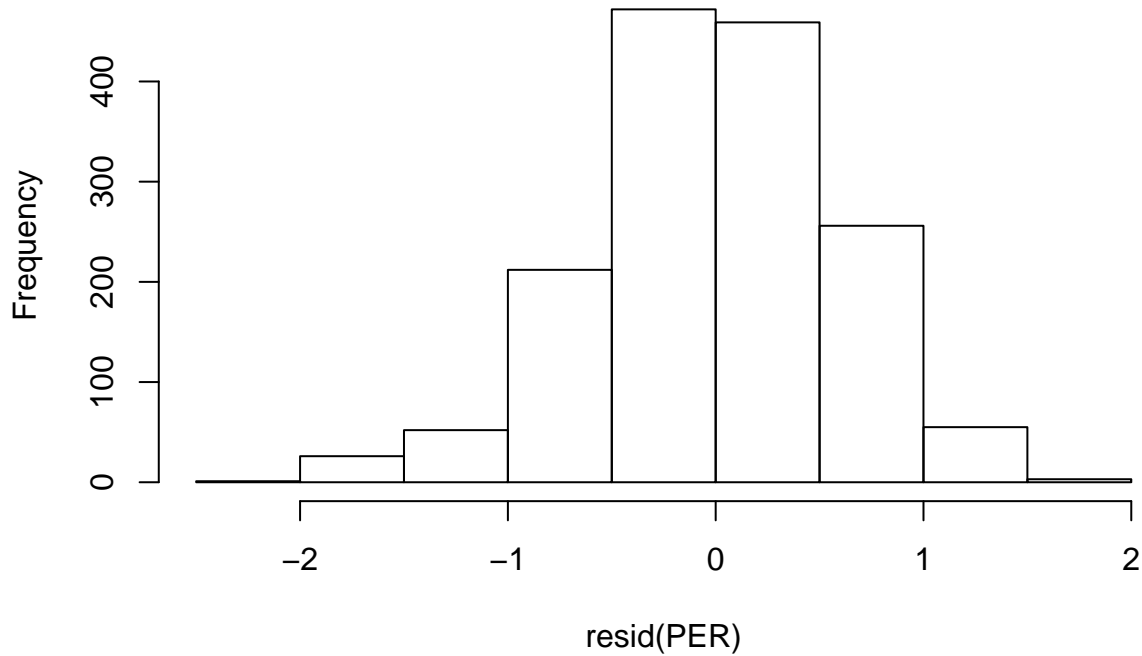

```
## MODEL PLATICHTHYS FLESUS ##
yearPLA<-as.factor(Pla$year)
traitPLA<-as.factor(Pla$trait)
PLA<-lmer(v~yearPLA+exposure+(1|station)+(1|traitPLA) ,Pla)
summary(PLA)
```

```
## Linear mixed model fit by REML. t-tests use Satterthwaite's method [
## lmerModLmerTest]
## Formula: v ~ yearPLA + exposure + (1 | station) + (1 | traitPLA)
## Data: Pla
##
## REML criterion at convergence: 2924.3
##
## Scaled residuals:
## Min 1Q Median 3Q Max
## -3.6632 -0.5800 0.0122 0.6821 2.6777
##
## Random effects:
## Groups Name Variance Std.Dev.
## traitPLA (Intercept) 0.551455 0.74260
## station (Intercept) 0.007416 0.08612
## Residual 0.358299 0.59858
## Number of obs: 1536, groups: traitPLA, 24; station, 16
##
## Fixed effects:
## Estimate Std. Error df t value Pr(>|t|)
## (Intercept) 0.06410 0.15834 26.67600 0.405 0.68884
## yearPLA1989 -0.03602 0.04320 1494.00000 -0.834 0.40458
## yearPLA2000 0.10348 0.04320 1494.00000 2.395 0.01673 *
## yearPLA2013 0.12563 0.04320 1494.00000 2.908 0.00369 **
```

```
## exposureS      -0.05553    0.05279   14.00000   -1.052   0.31073
## ---
## Signif. codes:  0 '***' 0.001 '**' 0.01 '*' 0.05 '.' 0.1 ' ' 1
##
## Correlation of Fixed Effects:
##           (Intr) yPLA19 yPLA200 yPLA201
## yearPLA1989 -0.136
## yearPLA2000 -0.136  0.500
## yearPLA2013 -0.136  0.500  0.500
## exposureS   -0.167  0.000  0.000  0.000
```

```
hist(resid(PLA))
```

**Histogram of resid(PLA)**

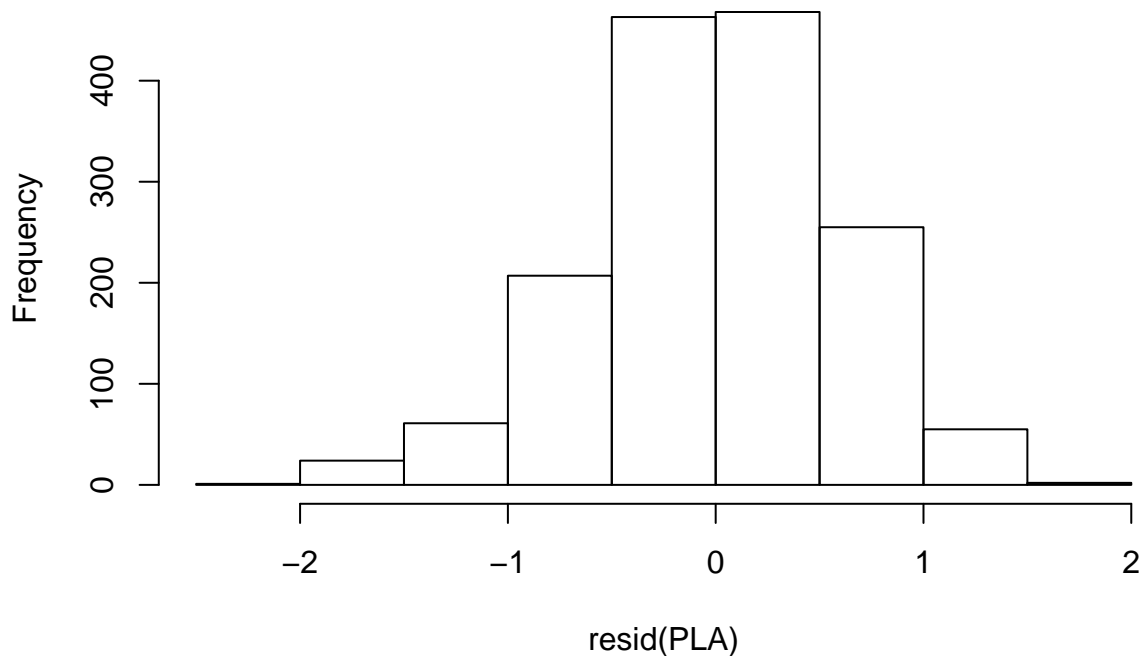

```
## MODEL RUTILUS RUTILUS ##
yearRUT<-as.factor(Rut$year)
traitRUT<-as.factor(Rut$trait)
RUT<-lmer(v~yearRUT+exposure+(1|station)+(1|traitRUT) ,Rut)
summary(RUT)
```

```
## Linear mixed model fit by REML. t-tests use Satterthwaite's method [
## lmerModLmerTest]
## Formula: v ~ yearRUT + exposure + (1 | station) + (1 | traitRUT)
## Data: Rut
##
## REML criterion at convergence: 2857.1
##
## Scaled residuals:
##   Min      1Q  Median      3Q      Max
## -3.6616 -0.5327  0.0053  0.6593  2.7228
##
## Random effects:
```

```
## Groups Name Variance Std.Dev.
## traitRUT (Intercept) 0.577903 0.76020
## station (Intercept) 0.008163 0.09035
## Residual 0.342145 0.58493
## Number of obs: 1536, groups: traitRUT, 24; station, 16
##
## Fixed effects:
## Estimate Std. Error df t value Pr(>|t|)
## (Intercept) 0.03934 0.16191 26.60103 0.243 0.80989
## yearRUT1989 -0.02901 0.04221 1494.00000 -0.687 0.49207
## yearRUT2000 0.09586 0.04221 1494.00000 2.271 0.02329 *
## yearRUT2013 0.11648 0.04221 1494.00000 2.759 0.00586 **
## exposureS -0.05368 0.05415 14.00000 -0.991 0.33830
## ---
## Signif. codes: 0 '***' 0.001 '**' 0.01 '*' 0.05 '.' 0.1 ' ' 1
##
## Correlation of Fixed Effects:
## (Intr) yRUT19 yRUT200 yRUT201
## yearRUT1989 -0.130
## yearRUT2000 -0.130 0.500
## yearRUT2013 -0.130 0.500 0.500
## exposureS -0.167 0.000 0.000 0.000
```

```
hist(resid(RUT))
```

**Histogram of resid(RUT)**

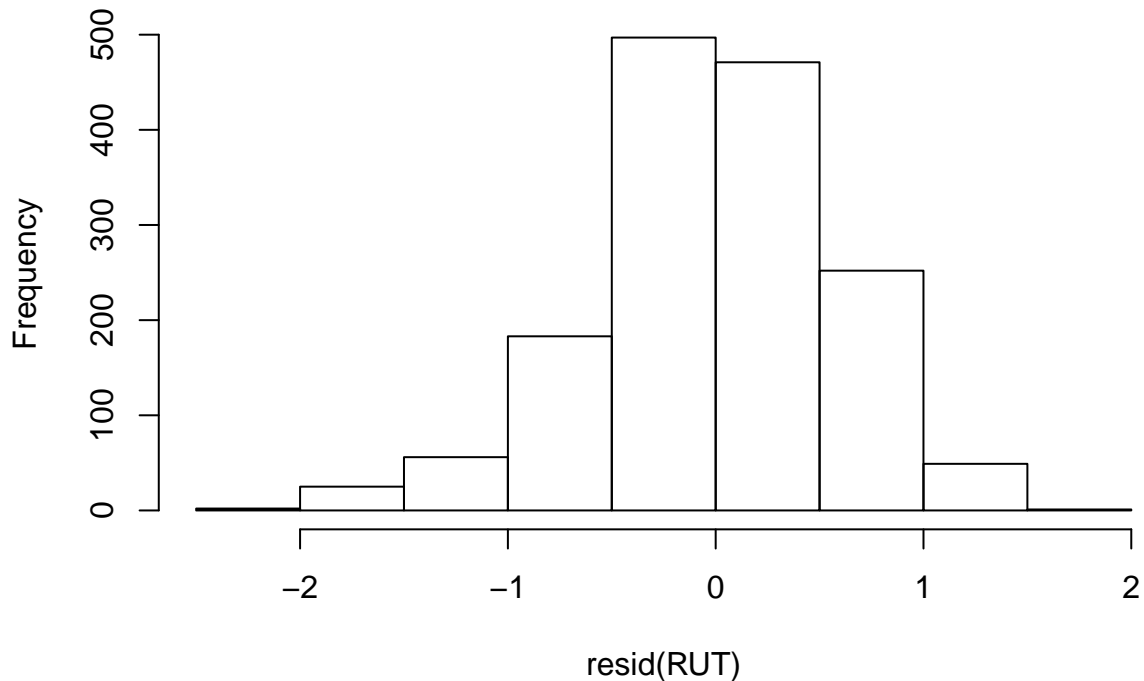

```
## MODEL TRIGLOPSIS QUADRICORNIS ##
yearTRI<-as.factor(Tri$year)
traitTRI<-as.factor(Tri$trait)
TRI<-lmer(v~yearTRI+exposure+exposure+(1|station)+(1|traitTRI),Tri)
summary(TRI)
```



```

## Linear mixed model fit by REML. t-tests use Satterthwaite's method [
## lmerModLmerTest]
## Formula:
## v ~ yearTRI + exposure + exposure + (1 | station) + (1 | traitTRI)
##   Data: Tri
##
## REML criterion at convergence: 2611.4
##
## Scaled residuals:
##   Min       1Q   Median       3Q      Max
## -4.5078 -0.2066  0.0091  0.2613  4.3104
##
## Random effects:
##   Groups   Name                Variance Std.Dev.
## traitTRI (Intercept) 0.877476 0.93674
## station  (Intercept) 0.004735 0.06881
## Residual                0.289530 0.53808
## Number of obs: 1536, groups: traitTRI, 24; station, 16
##
## Fixed effects:
##              Estimate Std. Error      df t value Pr(>|t|)
## (Intercept) -2.911e-01  1.952e-01  2.469e+01  -1.491 0.148521
## yearTRI1989 -4.973e-03  3.883e-02  1.494e+03  -0.128 0.898106
## yearTRI2000  1.330e-01  3.883e-02  1.494e+03   3.424 0.000633 ***
## yearTRI2013  7.563e-02  3.883e-02  1.494e+03   1.948 0.051646 .
## exposureS   -4.437e-02  4.402e-02  1.400e+01  -1.008 0.330636
## ---
## Signif. codes:  0 '***' 0.001 '**' 0.01 '*' 0.05 '.' 0.1 ' ' 1
##
## Correlation of Fixed Effects:
##              (Intr) yTRI19 yTRI200 yTRI201
## yearTRI1989 -0.099
## yearTRI2000 -0.099  0.500
## yearTRI2013 -0.099  0.500  0.500
## exposureS   -0.113  0.000  0.000  0.000

```

hist(resid(TRI))

**Histogram of resid(TRI)**

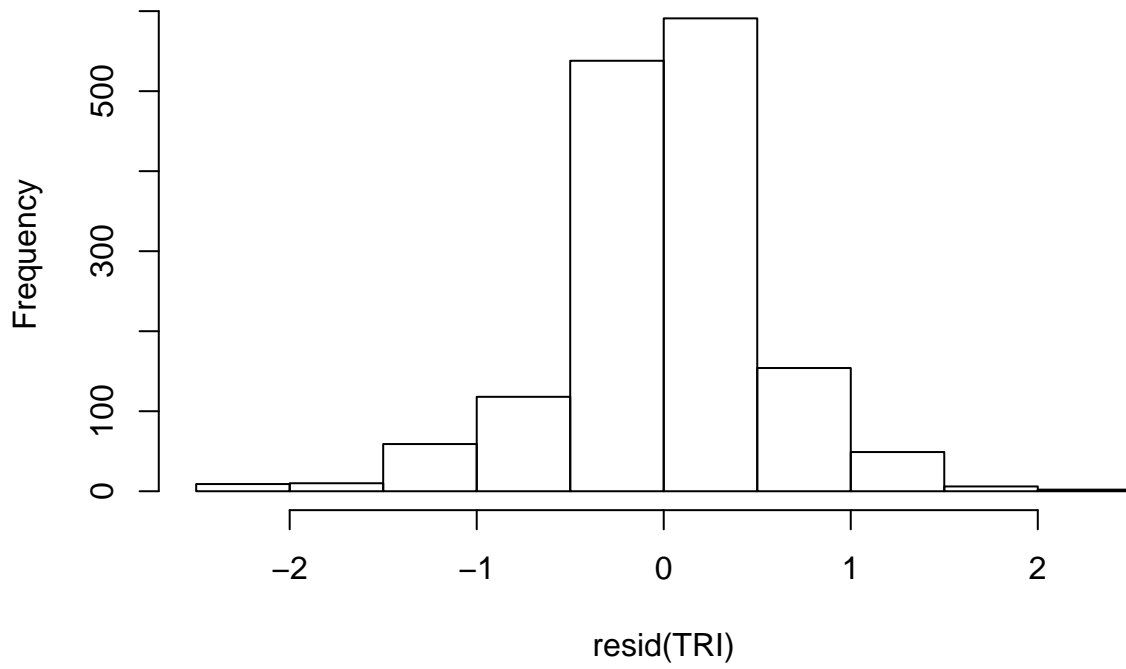

Supplement: peerj-06-5899-s004.pdf [file peerj-06-5899-s004.pdf]
